# Supplementary material for: Fibroblast proximity to a tumor impacts fibroblast extracellular vesicles produced by 3D bioprinted stromal models
Source: Royal Society of Chemistry journal article supplement (doi:10.1039/d4bm01569j), 2025-01-01
Supplement: d4bm01569j1.pdf [file d4bm01569j1.pdf]

### **Supplementary Information for**

Fibroblast proximity to a tumor impacts fibroblast extracellular vesicles produced by 3D bioprinted stromal models

Jensen N Amens, Jun Yang, Lauren Hawthorne, Pinar Zorlutuna

Pinar Zorlutuna

Email: [pzorlutu@nd.edu](mailto:pzorlutu@nd.edu)

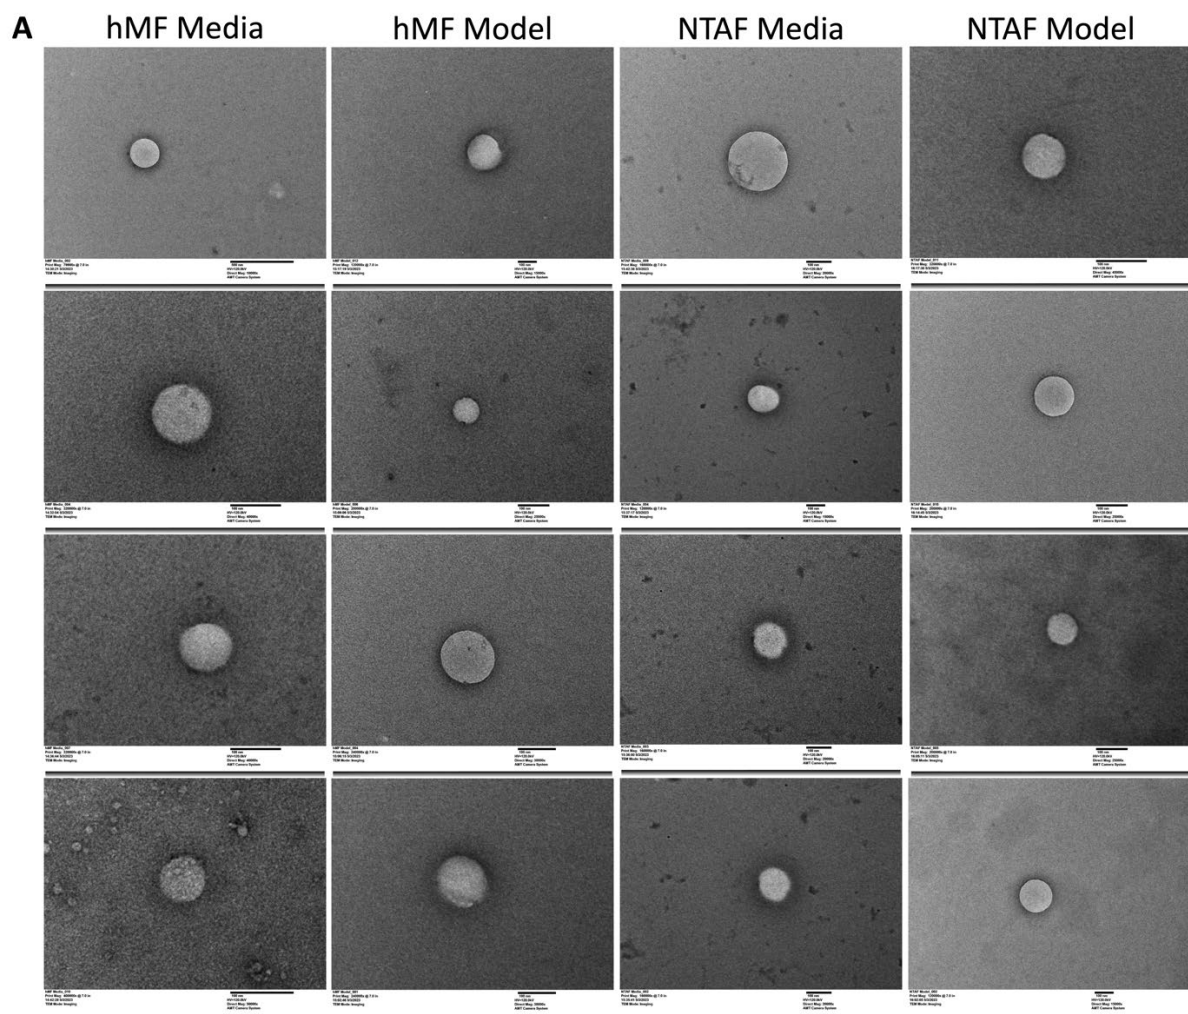

**Supplementary Figure 1:** TEM images of EVs from each of the EV experimental group.
